## SHORT COMMUNICATION

### AN *IN VITRO* AND *IN VIVO* STUDY OF THE DISTRIBUTION OF AMMONIA BETWEEN PLASMA AND RED CELLS OF RAINBOW TROUT (*SALMO GAIRDNERI*)

BY P. A. WRIGHT<sup>1</sup>, C. M. WOOD<sup>2</sup> AND D. J. RANDALL<sup>1,\*</sup>

<sup>1</sup>*Department of Zoology, University of British Columbia,  
6270 University Boulevard, Vancouver, British Columbia, Canada, V6T 2A9*  
and <sup>2</sup>*Department of Biology, McMaster University, Hamilton, Ontario,  
Canada, L8S 4K1*

*Accepted 22 July 1987*

Fish are ammoniotelic animals and therefore produce ammonia as the end-product of protein metabolism. (The term ammonia or  $T_{\text{amm}}$  will be used to indicate the total ammonia concentration, while  $\text{NH}_4^+$  and  $\text{NH}_3$  will refer to ammonium ion and ammonia, respectively.) Ammonia is a weak base that is produced as  $\text{NH}_3$  or  $\text{NH}_4^+$  depending on the biochemical reaction and exists in solution as  $\text{NH}_3$  and  $\text{NH}_4^+$ . Owing to the relatively high pK of ammonia (pK = 9.7 at 10°C) and the physiological pH of body fluids, the predominant form of ammonia in tissue compartments is the ionic form,  $\text{NH}_4^+$ . Biological membranes are highly permeable to  $\text{NH}_3$  and much less permeable to  $\text{NH}_4^+$  (Klocke, Andersson, Rotman & Forster, 1972; Castell & Moore, 1971; Bown *et al.* 1975; Boron, 1980; Lockwood, Finn, Campbell & Richman, 1980), which requires ion carriers for transport. Thus, the extent of movement of  $\text{NH}_4^+$  between tissue compartments depends on the availability of these carriers and their affinity for  $\text{NH}_4^+$ . Transfer of ammonia between tissue compartments is largely determined by  $\text{NH}_3$  gradients (see Randall & Wright, 1987), but  $\text{NH}_4^+$  electrochemical gradients may also be important (Thomas, 1974; Boron & DeWeer, 1976). The purpose of this study was to determine whether ammonia was passively distributed between red cells and plasma at rest and during an extracellular acidosis. Protons are passively distributed across red cell membranes over a range of pH values in trout (Heming *et al.* 1986). Thus, if ammonia is passively distributed, the distribution will be determined by red cell-to-plasma pH gradients.

In the *in vitro* experiments blood was collected from the dorsal aortic catheter (for technique, see Soivio, Westman & Nyholm, 1972) of donor fish, pooled, and then divided between tonometers (4 ml per tonometer). Each tonometer received either a 0.2%  $\text{CO}_2$  (control) or a 1.0%  $\text{CO}_2$  (hypercapnia) humidified gas mixture in air and

\* To whom reprint requests should be addressed.

Key words: ammonia, red cell, trout.

was shaken for 90 min in a 9°C water bath before measurements were taken. Blood was analysed for whole blood pH ( $\text{pH}_e$ ), red cell pH ( $\text{pH}_i$ ), whole blood and plasma ammonia concentrations ( $T_{\text{amm}}$ ), plasma and red cell water content, and haematocrit (Hct). In the *in vivo* experiment, dorsal aortic cannulated fish were placed in individual, low volume (2 l) flow-through chambers to recover for 48 h. In the 30 min prior to sampling, inflow water was turned off and fish chambers were aerated with either 100% air (water pH = 7.0, control) or switched to 1%  $\text{CO}_2$  in air (water pH = 5.6, hypercapnia). A 2 ml blood sample was withdrawn from each fish at the end of 30 min and analysed for  $\text{pH}_e$ ,  $\text{pH}_i$ , whole blood and plasma  $T_{\text{amm}}$ , plasma and red cell water content, and Hct.

Arterial  $\text{pH}_e$  was measured immediately after blood had been collected using a Radiometer microelectrode (E5021) and acid-base analyser (PHM72), maintained at 9°C. Red cell  $\text{pH}_i$  was directly measured by the freeze-thaw technique (Zeidler & Kim, 1977). Plasma and red cell water content were calculated from initial wet weights and final dry weights after samples had been dried to constant weight in an oven (100°C). Whole blood and plasma samples (250  $\mu\text{l}$ ) were assayed for  $T_{\text{amm}}$  by the glutamate dehydrogenase enzymatic assay (Kun & Kearney, 1971). Red cell  $T_{\text{amm}}$  was calculated as follows:

$$\text{red cell } T_{\text{amm}} = \frac{\{(\text{whole blood } T_{\text{amm}}) - ([1 - \text{Hct}/100] [\text{plasma } T_{\text{amm}}])\}}{\text{Hct}/100}$$

Red cell  $T_{\text{amm}}$  levels calculated above were then corrected for water content and the final concentration was expressed as  $\mu\text{mol l}^{-1}$  cell water. Data are expressed as mean  $\pm$  1 S.E.M. ( $N$ ), where  $N$  equals the number of animals sampled (*in vivo*) or the number of tonometers containing blood (*in vitro*). Student's paired and unpaired  $t$ -tests have been used to compare the significance ( $P < 0.05$ ) between mean values.

Slight quantitative differences between *in vitro* and *in vivo* data are shown in Table 1, but the overall results and conclusions are the same whether blood was held in tonometers (*in vitro*) or in live animals (*in vivo*) prior to analysis. Red cell ammonia levels are consistently higher than plasma levels, resulting in ammonia concentration ratios (plasma-to-red cell) of between 0.3 and 0.4 (Table 1). Control red cell pH, predicted from the plasma-to-red cell ammonia distribution was not significantly different from measured  $\text{pH}_i$  and there was no difference between calculated plasma and red cell  $\text{NH}_3$  tensions ( $P_{\text{NH}_3}$ ) in the control experiment (*in vitro* and *in vivo*, Table 2). The same was not true for the hypercapnia experiment (*in vitro* and *in vivo*), where predicted red cell pH, was significantly different from measured  $\text{pH}_i$  and calculated red cell  $P_{\text{NH}_3}$  was greater than plasma  $P_{\text{NH}_3}$  (Table 2). Our calculations of  $P_{\text{NH}_3}$  levels assume an equilibrium between  $\text{NH}_3$  and  $\text{NH}_4^+$  in each compartment. Thus, when there is an  $\text{NH}_3$  gradient from red cell to plasma there will also be an electrochemical gradient for  $\text{NH}_4^+$ . In hypercapnia, therefore, there is a net diffusion gradient for both  $\text{NH}_3$  and  $\text{NH}_4^+$  out of the red cell.

Ammonia gradients during hypercapnia may develop between intra- and extra-cellular compartments because of high rates of ammonia production. We tested this possibility in trout blood *in vitro*, by following whole blood  $T_{\text{amm}}$  levels over time

during hypercapnic exposure, and found that ammonia levels did not change. Thus, intracellular ammoniogenesis is not a factor in the development of  $P_{\text{NH}_3}$  gradients during hypercapnia. Ammonia accumulation in the red cell, therefore, can only be maintained by the active uptake of  $\text{NH}_4^+$  in the face of  $\text{NH}_3$  diffusion out of the red cell down the  $P_{\text{NH}_3}$  gradient and  $\text{NH}_4^+$  electrochemical gradient. Secondary active transport of  $\text{NH}_4^+$  is linked to the energetically favourable movement of  $\text{Na}^+$  in

Table 1. Ammonia distribution between red cells and plasma in trout, in vitro and in vivo, under control and hypercapnic conditions

| Treatment                      | $\text{pH}_e$        | $\text{pH}_i$<br>(freeze-thaw<br>method) | Plasma<br>$T_{\text{amm}}$<br>( $\mu\text{mol l}^{-1}$ ) | Red cell<br>$T_{\text{amm}}$<br>( $\mu\text{mol l}^{-1}$ ) | Ammonia<br>concentration<br>ratio† |
|--------------------------------|----------------------|------------------------------------------|----------------------------------------------------------|------------------------------------------------------------|------------------------------------|
| Control                        |                      |                                          |                                                          |                                                            |                                    |
| <i>in vitro</i><br>( $N = 6$ ) | $8.03 \pm 0.05$      | $7.48 \pm 0.02$                          | $304 \pm 8$                                              | $1048 \pm 81$                                              | 0.29                               |
| <i>in vivo</i><br>( $N = 7$ )  | $8.02 \pm 0.03$      | $7.50 \pm 0.01$                          | $311 \pm 19$                                             | $782 \pm 55$                                               | 0.40                               |
| Hypercapnia                    |                      |                                          |                                                          |                                                            |                                    |
| <i>in vitro</i><br>( $N = 7$ ) | $7.63 \pm 0.02^*$    | $7.25 \pm 0.01^*$                        | $318 \pm 9$                                              | $969 \pm 52$                                               | 0.33                               |
| <i>in vivo</i><br>( $N = 7$ )  | $7.55 \pm 0.02^{**}$ | $7.28 \pm 0.01^{**}$                     | $323 \pm 3$                                              | $872 \pm 30$                                               | 0.37                               |

Red cell  $\text{pH}_i$  was measured directly by the freeze-thaw method.  
 \* Significantly different from *in vitro* control, paired *t*-test,  $P < 0.05$ .  
 \*\* Significantly different from *in vivo* control, unpaired *t*-test,  $P < 0.05$ .  
 † Ratio of plasma  $T_{\text{amm}}$  to red cell  $T_{\text{amm}}$ .

Table 2. Measured red cell  $\text{pH}_i$  from Table 1 compared with red cell  $\text{pH}_i$  calculated from the ratio  $\text{NH}_3:\text{NH}_4^+$  in the red cell using the Henderson-Hasselbalch equation

| Treatment                   | $\text{pH}_i$<br>(freeze-thaw<br>technique) | $\text{pH}_i$<br>(ammonia) | Plasma<br>$P_{\text{NH}_3}$<br>( $\mu\text{Torr}$ ) | Red cell<br>$P_{\text{NH}_3}$<br>( $\mu\text{Torr}$ ) |
|-----------------------------|---------------------------------------------|----------------------------|-----------------------------------------------------|-------------------------------------------------------|
| Control                     |                                             |                            |                                                     |                                                       |
| <i>in vitro</i> ( $N = 6$ ) | $7.48 \pm 0.02$                             | $7.46 \pm 0.05$            | $103.2 \pm 13.4$                                    | $106.7 \pm 10.5$                                      |
| <i>in vivo</i> ( $N = 7$ )  | $7.50 \pm 0.01$                             | $7.51 \pm 0.04$            | $97.2 \pm 8.5$                                      | $93.5 \pm 6.0$                                        |
| Hypercapnia                 |                                             |                            |                                                     |                                                       |
| <i>in vitro</i> ( $N = 7$ ) | $7.25 \pm 0.01$                             | $7.11 \pm 0.04^*$          | $43.3 \pm 2.7$                                      | $59.9 \pm 4.2^{**}$                                   |
| <i>in vivo</i> ( $N = 7$ )  | $7.28 \pm 0.01$                             | $7.09 \pm 0.01^*$          | $36.2 \pm 1.7$                                      | $56.6 \pm 2.0^{**}$                                   |

This calculation assumes that plasma  $\text{NH}_3 = \text{red cell } \text{NH}_3$  and red cell  $\text{NH}_4^+ = \text{red cell } (T_{\text{amm}} - \text{NH}_3)$ .

Plasma  $P_{\text{NH}_3}$  calculated with plasma  $T_{\text{amm}}$  and  $\text{pH}_e$  is compared with red cell  $P_{\text{NH}_3}$  calculated with red cell  $T_{\text{amm}}$  and red cell  $\text{pH}_i$ , values taken from Table 1.

\* Significantly different from measured  $\text{pH}_i$ , unpaired *t*-test,  $P < 0.05$ .

\*\* Significantly different from plasma  $P_{\text{NH}_3}$ , unpaired *t*-test,  $P < 0.05$ .

1 Torr = 133.3 Pa.

many cells (see Maetz & Garcia-Romeu, 1964; Kinsella & Aronson, 1981; Wright & Wood, 1985). The trout red cell membrane  $\text{Na}^+/\text{H}^+$  exchange mechanism is known to be active during an acidosis (Nikinmaa, Steffensen, Tufts & Randall, 1987), but if  $\text{NH}_4^+$  can replace  $\text{H}^+$  in exchange for  $\text{Na}^+$ , then red cell ammonia stores would be depleted during hypercapnia. Instead, we observed an accumulation of ammonia during hypercapnia, therefore  $\text{NH}_4^+$  substitution for  $\text{H}^+$  in  $\text{Na}^+/\text{H}^+$  exchange cannot be involved. The ability of  $\text{NH}_4^+$  to replace  $\text{K}^+$  in  $\text{Na}^+, \text{K}^+$ -ATPase is well established in many tissues, including red cell membranes (Post & Jolly, 1957; Sorensen, 1981). We tested the possibility that  $\text{NH}_4^+$  was replacing  $\text{K}^+$  in the  $\text{Na}^+, \text{K}^+$ -ATPase by adding the specific  $\text{Na}^+, \text{K}^+$ -ATPase inhibitor, ouabain, to hypercapnic blood, *in vitro* (Tables 3, 4). The addition of ouabain did not alter the distribution of ammonia between red cells and plasma (Table 3) and red cell-to-plasma  $P_{\text{NH}_3}$  gradients were not abolished (Table 4). This implies that even if  $\text{Na}^+, \text{K}^+$ -ATPase plays a role in ammonia accumulation within the red cell during hypercapnia, it cannot be a major one.

Table 3. *Ammonia distribution between red cells and plasma (in vitro) during hypercapnia, with ouabain ( $10^{-4}$  mol l $^{-1}$ ) and without (control)*

| Treatment          | pH <sub>e</sub> | pH <sub>i</sub><br>(freeze-thaw<br>method) | Plasma<br>T <sub>amm</sub><br>( $\mu\text{mol l}^{-1}$ ) | Red cell<br>T <sub>amm</sub><br>( $\mu\text{mol l}^{-1}$ ) | Ammonia<br>concentration<br>ratio† |
|--------------------|-----------------|--------------------------------------------|----------------------------------------------------------|------------------------------------------------------------|------------------------------------|
| Control<br>(N = 7) | 7.64 ± 0.03     | 7.25 ± 0.03                                | 346 ± 17                                                 | 1016 ± 61                                                  | 0.34                               |
| Ouabain<br>(N = 7) | 7.64 ± 0.01     | 7.24 ± 0.01                                | 354 ± 16                                                 | 1000 ± 82                                                  | 0.35                               |

† Ratio of plasma T<sub>amm</sub> to red cell T<sub>amm</sub>.  
No significant difference between control and ouabain values.

Table 4. *Measured red cell pH<sub>i</sub> from Table 3 compared with red cell pH<sub>i</sub> calculated from the ratio  $\text{NH}_3:\text{NH}_4^+$  in the red cell using the Henderson-Hasselbalch equation, for control (without ouabain) and ouabain ( $10^{-4}$  mol l $^{-1}$ ) treatments*

| Treatment       | pH <sub>i</sub><br>(freeze-thaw<br>technique) | pH <sub>i</sub><br>(ammonia) | Plasma<br>P <sub>NH<sub>3</sub></sub><br>( $\mu\text{Torr}$ ) | Red cell<br>P <sub>NH<sub>3</sub></sub><br>( $\mu\text{Torr}$ ) |
|-----------------|-----------------------------------------------|------------------------------|---------------------------------------------------------------|-----------------------------------------------------------------|
| Control (N = 7) | 7.25 ± 0.03                                   | 7.13 ± 0.03*                 | 53 ± 2                                                        | 70 ± 4**                                                        |
| Ouabain (N = 7) | 7.24 ± 0.01                                   | 7.16 ± 0.03*                 | 55 ± 3                                                        | 69 ± 5**                                                        |

This calculation assumes that plasma  $\text{NH}_3 = \text{red cell } \text{NH}_3$  and that red cell  $\text{NH}_4^+ = \text{red cell } (\text{T}_{\text{amm}} - \text{NH}_3)$ .

Plasma  $P_{\text{NH}_3}$  calculated with plasma T<sub>amm</sub> and pH<sub>e</sub> is compared with red cell  $P_{\text{NH}_3}$  calculated with red cell T<sub>amm</sub> and red cell pH<sub>i</sub> values taken from Table 3.

\* Significantly different from measured pH<sub>i</sub>, unpaired *t*-test,  $P < 0.05$ .

\*\* Significantly different from plasma  $P_{\text{NH}_3}$ , unpaired *t*-test,  $P < 0.05$ .

1 Torr = 133.3 Pa.

It is possible that changes in pH and water content, which will lead to changes in ammonia distribution, may have caused the development of ammonia gradients between red cell and plasma during hypercapnia. Whole blood pH remained stable after 30 min of hypercapnia *in vitro*. Red cell water content increased significantly between control (*in vitro*,  $65.1 \pm 0.4\%$ ; *in vivo*,  $65.7 \pm 0.3\%$ ) and hypercapnia (*in vitro*,  $68.4 \pm 0.3\%$ ; *in vivo*,  $68.9 \pm 0.3\%$ ) experiments. It seems likely that the water content of red cells was stable following 90 min of exposure to hypercapnia *in vitro*. Thus it appears that non-steady states for pH and water content cannot account for the red cell-to-plasma  $P_{\text{NH}_3}$  gradients *in vitro* during hypercapnia. It also seems to be an unlikely explanation of the *in vivo* results because of the similarity of the *in vitro* and *in vivo* data.

We conclude that ammonia is passively distributed according to the plasma-to-red cell  $\text{H}^+$  distribution in blood at resting pH values, but not during hypercapnia. Ammonia accumulation during hypercapnia cannot be accounted for by red cell ammoniogenesis or  $\text{NH}_4^+$  substitution for  $\text{K}^+$  in the  $\text{Na}^+, \text{K}^+$ -ATPase, but must be due to some other active  $\text{NH}_4^+$  uptake process. Whether ammonia is passively distributed between plasma and other intracellular compartments in fish is not known. This question is interesting in light of the fact that the distribution of  $\text{H}^+$  across intracellular compartments, other than red cell membranes (Lassen, 1977; Heming *et al.* 1986), is not passive (see Roos & Boron, 1981). Thus, if  $\text{NH}_4^+$  is able to move across tissue membranes, then one would predict that the distribution of ammonia would follow the membrane potential and not the  $\text{H}^+$  distribution. However, if tissue membranes are essentially impermeable to  $\text{NH}_4^+$  then one would expect the distribution of ammonia to follow the  $\text{H}^+$  distribution, as do other weak acids and bases with impermeant ion forms (see Randall & Wright, 1987).

The authors wish to express their appreciation to Dr G. K. Iwama for helpful discussions during this project. This work has been funded by an EPA grant (CR 812 397-01-0) and an NSERC operating grant to DJR.

#### REFERENCES

- BORON, W. F. (1980). Intracellular pH regulation. In *Current Topics in Membranes and Transport*, vol. 13 (ed. F. Bronner, A. Kleinzeller & E. L. Boulpaep), pp. 3–22. New York: Academic Press.
- BORON, W. F. & DEWEER, P. (1976). Intracellular pH transients in squid giant axons caused by  $\text{CO}_2$ ,  $\text{NH}_3$  and metabolic inhibitors. *J. gen. Physiol.* **67**, 91–112.
- BOWN, R. L., GIBSON, J. A., FENTON, J. C. B., SNEDDEN, W., CLARK, M. L. & SLADEN, G. E. (1975). Ammonia and urea transport by the excluded human colon. *Clin. Sci. mol. Med.* **48**, 279–287.
- CASTELL, D. O. & MOORE, E. W. (1971). Ammonia absorption from the human colon. *Gastroenterology* **60**, 33–42.
- HEMING, T. A., RANDALL, D. J., BOUTILIER, R. G., IWAMA, G. K. & PRIMMETT, D. R. (1986). Ionic equilibria in red blood cells of rainbow trout (*Salmo gairdneri*):  $\text{Cl}^-$ ,  $\text{HCO}_3^-$  and  $\text{H}^+$ . *Respir. Physiol.* **65**, 223–234.
- KINSELLA, J. L. & ARONSON, P. S. (1981). Interaction of  $\text{NH}_4^+$  and  $\text{Li}^+$  with renal microvillus membrane  $\text{Na}^+-\text{H}^+$  exchanger. *Am. J. Physiol.* **241**, C220–C226.

- KLOCKE, R. A., ANDERSSON, K. K., ROTMAN, H. H. & FORSTER, R. E. (1972). Permeability of human erythrocytes to ammonia and weak acids. *Am. J. Physiol.* **222**, 1004–1013.
- KUN, E. & KEARNEY, E. B. (1971). Ammonia. In *Methods of Enzymatic Analysis*, vol. 4 (ed. H. U. Bergmeyer), pp. 1802–1806. New York: Academic Press.
- LASSEN, U. V. (1977). Electrical potential and conductance of the red cell membrane. In *Membrane Transport in Red Cells* (ed. J. C. Ellory & U. L. Lew), pp. 137–172. New York: Academic Press.
- LOCKWOOD, A. H., FINN, R. D., CAMPBELL, J. A. & RICHMAN, T. B. (1980). Factors that affect the uptake of ammonia by the brain: the blood-brain pH gradient. *Brain Res.* **181**, 259–266.
- MAETZ, J. & GARCIA-ROMEU, F. (1964). The mechanism of sodium and chloride uptake by the gills of a freshwater fish, *Carassius auratus*. II. Evidence for  $\text{NH}_4^+/\text{Na}^+$  and  $\text{HCO}_3^-$  exchanges. *J. gen. Physiol.* **47**, 1209–1227.
- NIKINMAA, M., STEFFENSEN, J., TUFTS, B. & RANDALL, D. (1987). Control of red cell volume and pH in trout. Effects of isoproterenol, transport inhibitors and extracellular pH in bicarbonate/carbon dioxide-buffered media. *J. exp. Zool.* **242**, 273–281.
- POST, R. L. & JOLLY, P. C. (1957). The linkage of sodium, potassium, and ammonium active transport across the human erythrocyte membrane. *Biochim. biophys. Acta* **25**, 118–128.
- RANDALL, D. J. & WRIGHT, P. A. (1987). Ammonia distribution and excretion in fish. *Fish Physiol. Biochem.* **3**, 107–120.
- ROOS, A. & BORON, W. F. (1981). Intracellular pH. *Physiol. Rev.* **61**, 296–434.
- SOIVIO, A., WESTMAN, K. & NYHOLM, K. (1972). Improved method of dorsal aorta catheterization: haematological effects followed for three weeks in rainbow trout (*Salmo gairdneri*). *Finn. Fish. Res.* **1**, 11–21.
- SORENSEN, P. G. (1981). Some properties of the  $\text{Na}^+ + \text{K}^+$ -linked  $\text{Mg}^{2+}$ -dependent adenosine triphosphate from the erythrocyte plasma membrane of the flounder (*Platichthys flesus* L.). *Comp. Biochem. Physiol.* **69C**, 45–52.
- THOMAS, R. C. (1974). Intracellular pH of snail neurones measured with a new pH-sensitive glass microelectrode. *J. Physiol., Lond.* **238**, 159–180.
- WRIGHT, P. A. & WOOD, C. M. (1985). An analysis of branchial ammonia excretion in the freshwater rainbow trout: effects of environmental pH change and sodium uptake blockade. *J. exp. Biol.* **114**, 329–353.
- ZEIDLER, R. & KIM, D. H. (1977). Preferential hemolysis of postnatal calf red cells induced by internal alkalization. *J. gen. Physiol.* **70**, 385–401.
